# Supplementary material for: Molecular Epidemiology and evolutionary characteristics of dengue virus serotype-2 strains in Sri Lanka
Source: Research Square preprint supplement (doi:10.21203/rs.3.rs-6726277/v1), 2025-06-29
Supplement: Supplementary file 1 [file 6248257037582c4160041155.docx]

**Supplementary Tables**

**Supplementary Table 1**

|  |  |  |
| --- | --- | --- |
| **Dengue Protein** | **Non-synonymous mutation** | **Region** | **Frequency** | **Percentage** |
| Envelope | E:Q52H | Domain I | 48/48 | 100.00 |
| Envelope | E:M6I | Domain I | 48/48 | 100.00 |
| Envelope | E:E71A | Fusion loop | 48/48 | 100.00 |
| Envelope | E:R120T | Domain II | 46/48 | 95.83 |
| Envelope | E:V129I | Domain II | 48/48 | 100.00 |
| Envelope | E:H149N | Domain I | 46/48 | 95.83 |
| Envelope | E:I164V | Domain I | 46/48 | 95.83 |
| Envelope | E:T171I | Domain I | 3/48 | 6.25 |
| Envelope | E:T176I | Domain I | 2/48 | 4.17 |
| Envelope | E:V309M | Domain III | 2/48 | 4.17 |
| Envelope | E:E360G | Domain III | 1/48 | 2.08 |
| Envelope | E:N390S | Domain III | 48/48 | 100.00 |
| Envelope | E:W453C | Transmembrane | 1/48 | 2.08 |
| Envelope | E:I484V | Tansmembrane | 48/48 | 100.00 |
| Envelope | E:T478S | Transmembrane | 48/48 | 100.00 |
| NS1 | NS1:K9N | Beta roll | 1/48 | 2.08 |
| NS1 | NS1:N10S | Beta roll | 1/48 | 2.08 |
| NS1 | NS1:I21V | Beta roll | 1/48 | 2.08 |
| NS1 | NS1:V60A | Wing | 2/48 | 4.17 |
| NS1 | NS1:S80T | Wing | 48/48 | 100.00 |
| NS1 | NS1:K116R | Wing | 2/48 | 4.17 |
| NS1 | NS1:T117A | Wing | 48/48 | 100.00 |
| NS1 | NS1:S128L | Wing | 47/48 | 97.92 |
| NS1 | NS1:S128P | Wing | 1/48 | 2.08 |
| NS1 | NS1:Q131H | Wing | 48/48 | 100.00 |
| NS1 | NS1:T164M | Wing-connector | 1/48 | 2.08 |
| NS1 | NS1:K174R | Wing-connector | 48/48 | 100.00 |
| NS1 | NS1:V177A | Wing-connector | 3/48 | 6.25 |
| NS1 | NS1:F178S | Wing-connector | 48/48 | 100.00 |
| NS1 | NS1:N191D | Beta ladder | 1/48 | 2.08 |
| NS1 | NS1:N222S | Spaghetti loop | 48/48 | 100.00 |
| NS1 | NS1:H224L | Spaghetti loop | 1/48 | 2.08 |
| NS1 | NS1:L247F | Spaghetti loop | 48/48 | 100.00 |
| NS1 | NS1:Q253H | Spaghetti loop | 1/48 | 2.08 |
| NS1 | NS1:I264T | Spaghetti loop | 48/48 | 100.00 |
| NS1 | NS1:T265A | Spaghetti loop | 48/48 | 100.00 |
| NS1 | NS1:K272R | Spaghetti loop | 48/48 | 100.00 |
| NS1 | NS1:F279L | Spaghetti loop | 3/48 | 6.25 |
| NS1 | NS1:D281E | C terminus | 47/48 | 97.92 |

**Supplementary Table 01: Non-synonymous mutations of DENV2 sequences in Sri Lanka.** The non-synonymous mutations in the envelope(E) and non-structural protein 1 (NS1) and their frequencies of occurrence in the 48 samples sequenced. The regions within the envelope and NS1 are marked according to the structures previously described [1, 2]

**Supplementary Table 02**

| **Clade** | **Tips** | **Rate** | **R-squared** |
| --- | --- | --- | --- |
| 2II_A | 7 | 8.841 x 10^-4 | 0.907 |
| 2II_A.1.2 | 2 | 6.532 x 10^-4 | 1 |
| 2II_F.1.1 | 99 | 1.445 x 10^-3 | 0.438 |
| 2V | 19 | 1.040 x 10^-3 | 0.963 |
| **Global** | **768** | **1.328 x 10^-3** | **0.7** |

**Supplementary Table 2:** Evolutionary rates of DENV2 global and Sri Lankan sequences based on molecular clock analysis. The evolutionary rates of global DENV2 and the rates of different genotypes and lineages (2_IIA, 2_IIF, 2_IIV) seen in Sri Lanka between 1996-2024 were analyzed using a molecular clock method. The R2 value being closer to 1 is indicative of a good fit to the molecular clock model for this clade, indicating that the rate is consistent over the specified timeline.

| **#Accession No** | **Sequence ID** |
| --- | --- |
| **PV752083** | SL_2017_TG65 |
| **PV752084** | SL_2017_TG64 |
| **PV752085** | SL_2017_TG49 |
| **PV752086** | SL_2017_TG47 |
| **PV752087** | SL_2017_TG46 |
| **PV752088** | SL_2017_TG45 |
| **PV752089** | SL_2017_R5 |
| **PV752090** | SL_2017_R4 |
| **PV752091** | SL_2017_R1 |
| **PV752092** | SL_2017_Y37 |
| **PV752093** | SL_2017_Y36 |
| **PV752094** | SL_2017_Y32 |
| **PV752095** | SL_2017_R14 |
| **PV752096** | SL_2017_R19 |
| **PV752097** | SL_2018_R74 |
| **PV752098** | SL_2017_TG48 |
| **PV752099** | SL_2018_P15A |
| **PV752100** | SL_2018_P55A |
| **PV752101** | SL_2018_P119A |
| **PV752102** | SL_2017_R9 |
| **PV752103** | SL_2017_R10 |
| **PV752104** | SL_2017_R12 |
| **PV752105** | SL_2017_R22 |
| **PV752106** | SL_2017_R24 |
| **PV752107** | SL_2017_R25 |
| **PV752108** | SL_2017_R34 |
| **PV752109** | SL_2017_R48 |
| **PV752110** | SL_2017_R64 |
| **PV752111** | SL_2018_R78 |
| **PV752112** | SL_2018_R86 |
| **PV752113** | SL_2018_R91 |
| **PV752114** | SL_2016_S36 |
| **PV752115** | SL_2017_TG4 |
| **PV752116** | SL_2017_TG6 |
| **PV752117** | SL_2017_TG9 |
| **PV752118** | SL_2017_TG10 |
| **PV752119** | SL_2017_TG11 |
| **PV752120** | SL_2017_TG33 |
| **PV752121** | SL_2017_TG39/ |
| **PV752122** | SL_2017_TG40 |
| **PV752123** | SL_2017_TG41 |
| **PV752124** | SL_2017_TG66 |
| **PV752125** | SL_2017_Y25 |
| **PV752126** | SL_2017_Y29 |
| **PV752127** | SL_2017_Y38 |
| **PV752128** | SL_2017_Y39 |
| **PV752129** | SL_2017_Y40 |
| **PV752130** | SL_2017_Y42 |
| **EPI_ISL_19901609** | SL_2022_SLS42 |
| **EPI_ISL_19906836** | SL_2022_SLS43 |
| **EPI_ISL_19906837** | SL_2023_SLS46 |

**Supplementary Table 03:** Sequences of DENV2 Sri Lankan sequences. Sri Lankan sequences (n=48) from 2016-2018 and 2022-23 used in the analysis were deposited in the [NCBI GenBank](https://www.ncbi.nlm.nih.gov/) and [GISAID](https://gisaid.org/) databases respectively. The accession numbers of the sequences are given above.

|  |
| --- |
